# Supplementary material for: Development of Matrix Metalloproteinase-2 Inhibitors for Cardioprotection
Source: PubMed Central journal article supplement (PMC5896266; doi:10.3389/fphar.2018.00296), 2018-04-05
Supplement: Image1.pdf [file Image1.pdf]

## Supplementary materials

### Supplementary Figure 1:

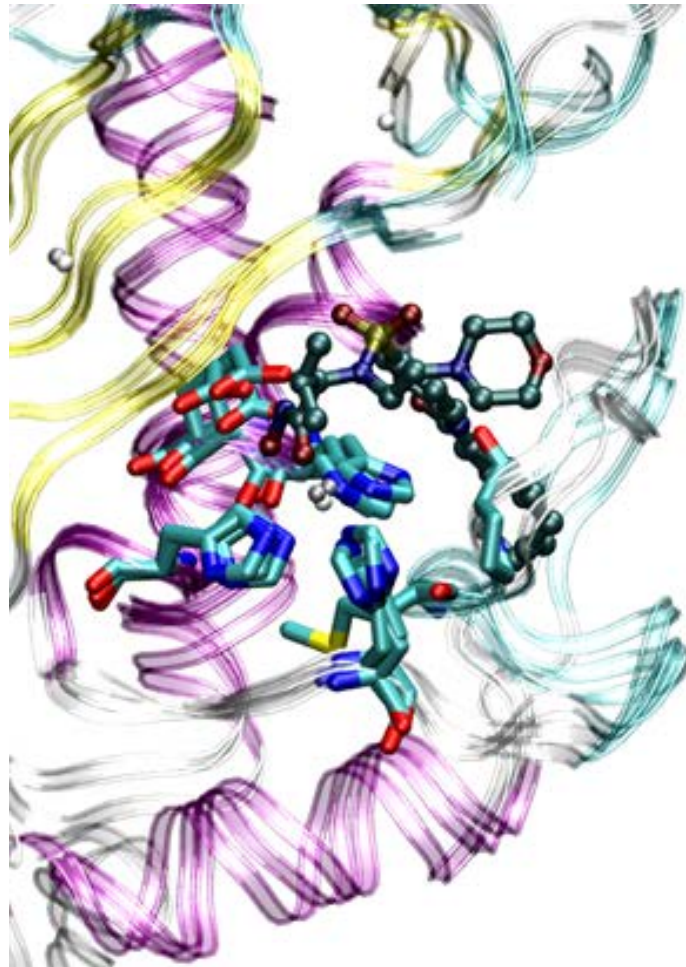

Superposition of the 3 MMP-2 model structures (PDB: 1EAK, 1CK7, 1HOV) in ribbon presentation.

The peptide side-chains are shown (in colored according to the atom types) around the Zn-ions

(small gray balls) In the 1HOV structure the SC-74020 inhibitor is shown. (originated from the

NMR structure of the 1HOV - SC-74020 complex).
