# Supplementary material for: Development of Matrix Metalloproteinase-2 Inhibitors for Cardioprotection
Source: PubMed Central journal article supplement (PMC5896266; doi:10.3389/fphar.2018.00296), 2018-04-05
Supplement: Image4.pdf [file Image4.pdf]

Supplementary Figure 4:

A#1

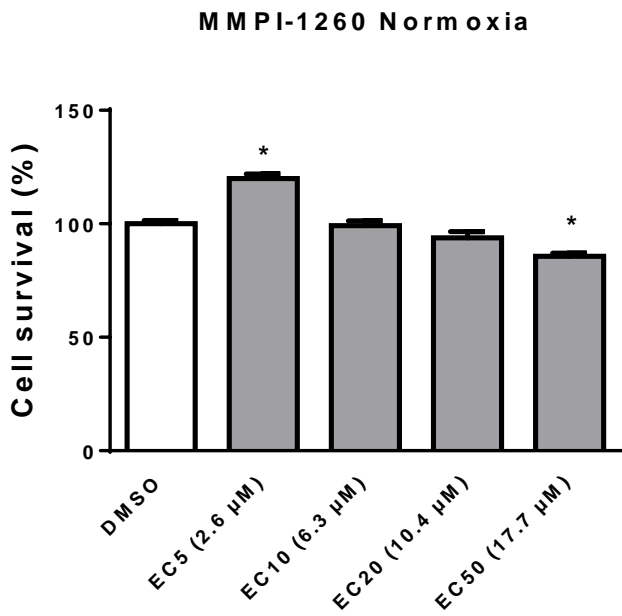

A#2

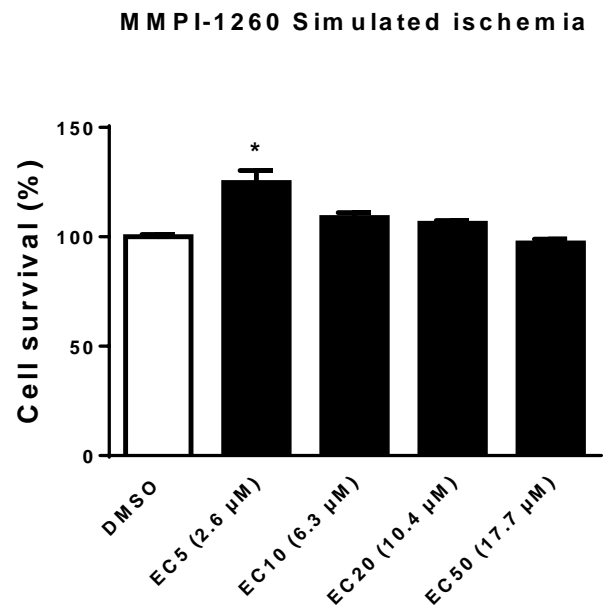

B#1

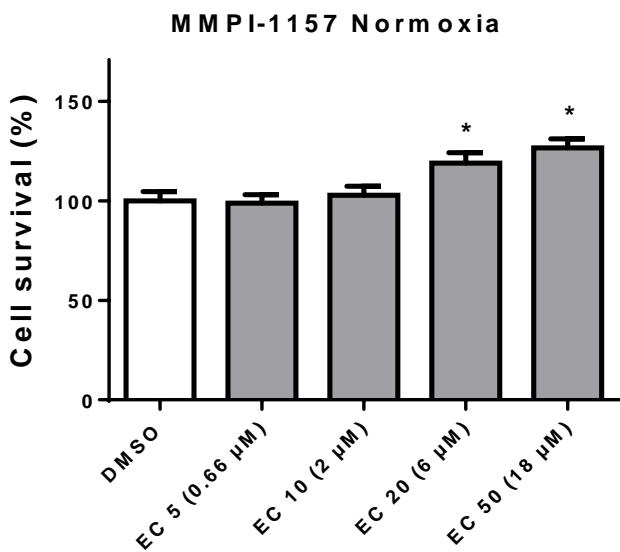

B#2

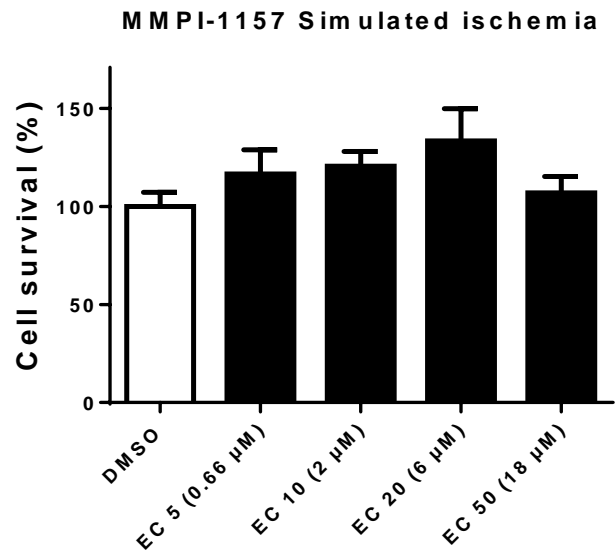

**C#1**

**C#2**

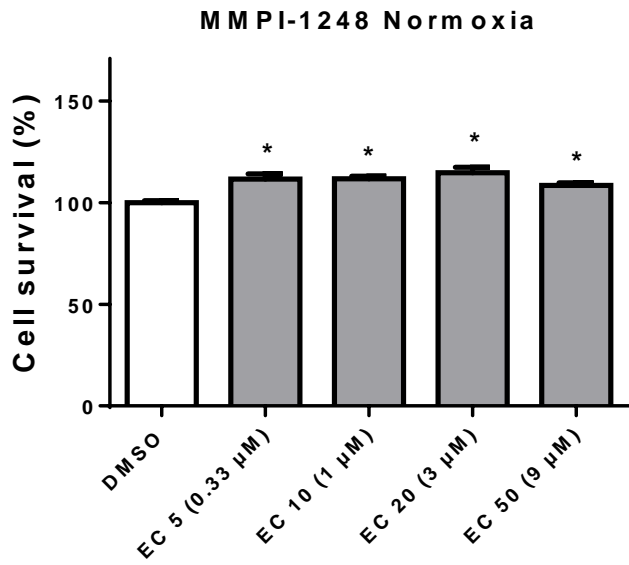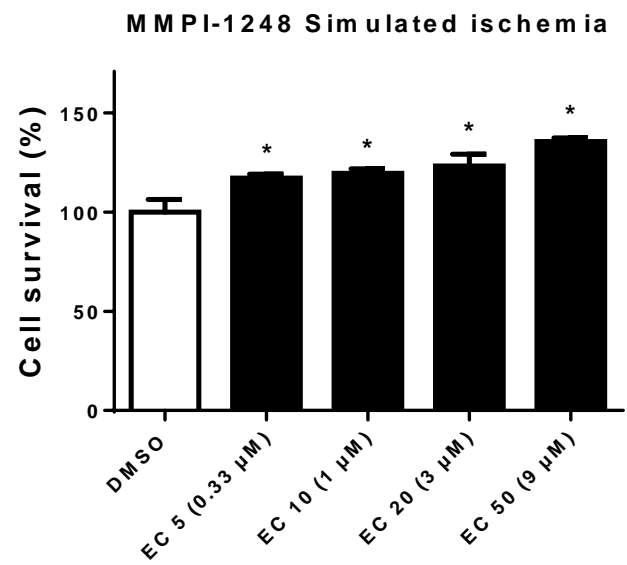

**D#1**

**D#2**

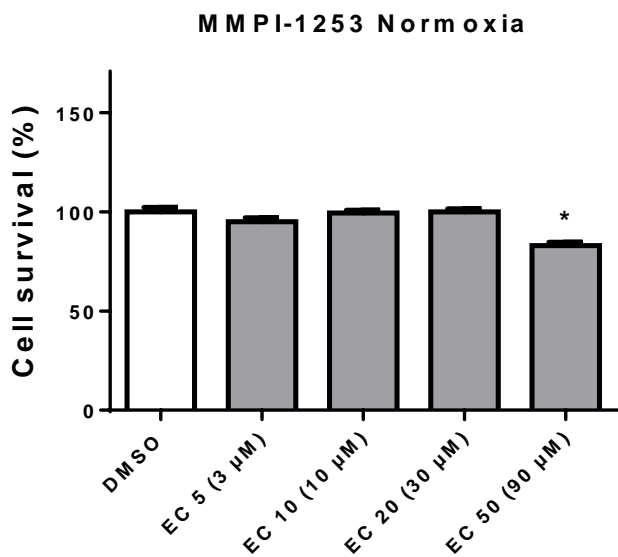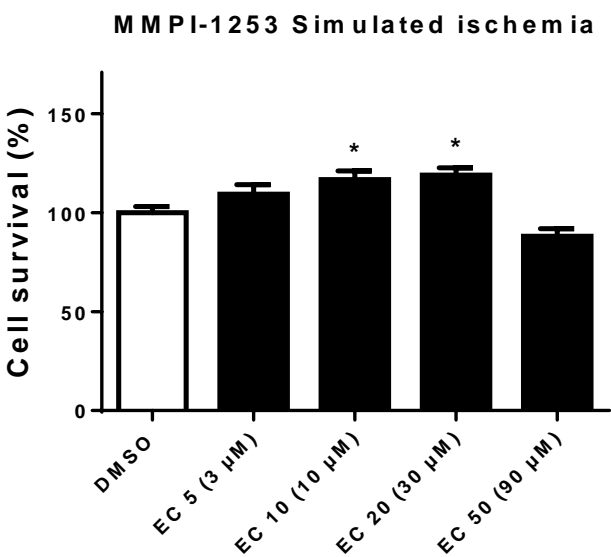

**E#1**

**E#2**

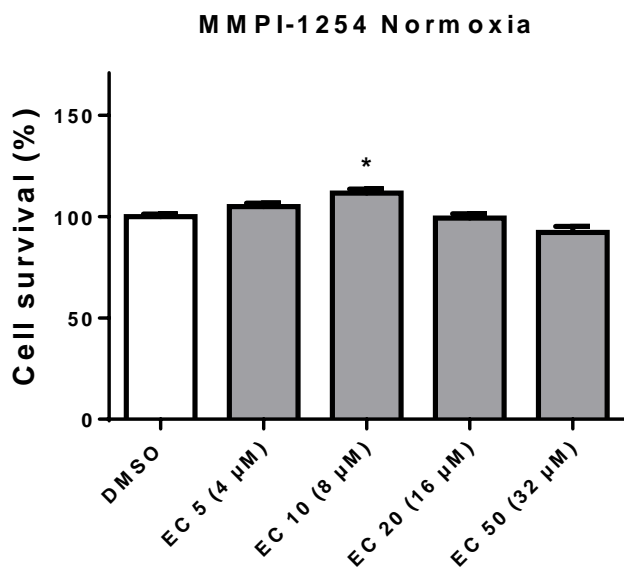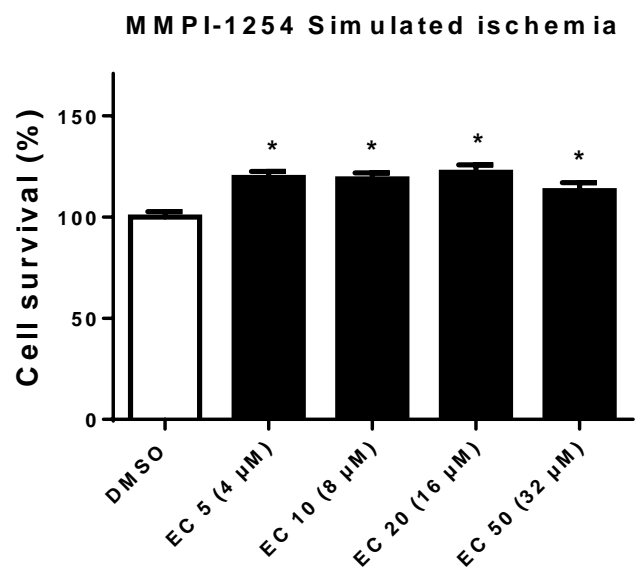

F#

F#2

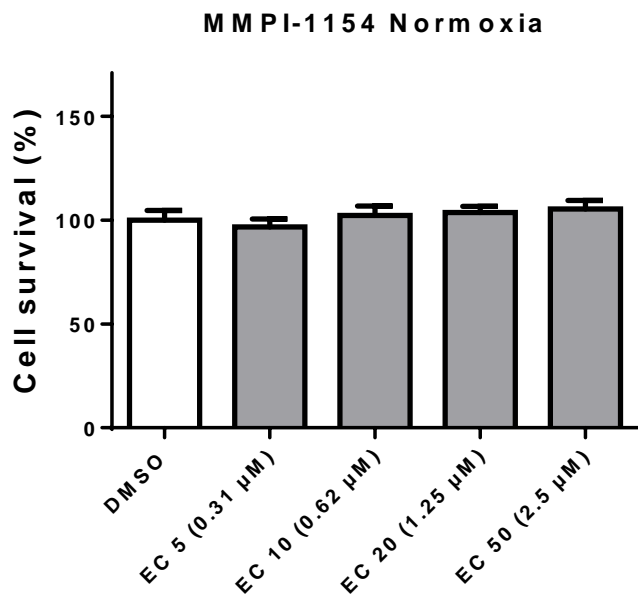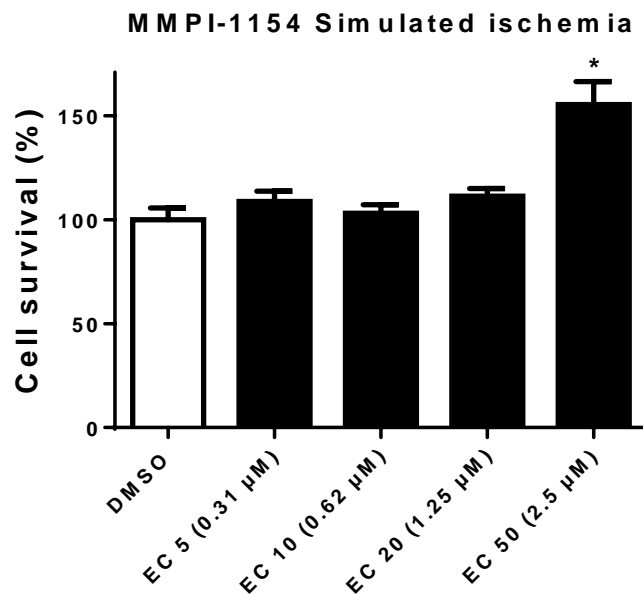

G#1

G#2

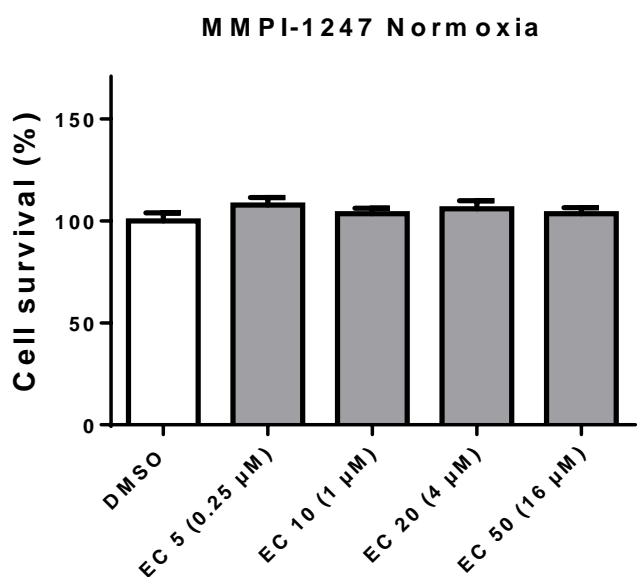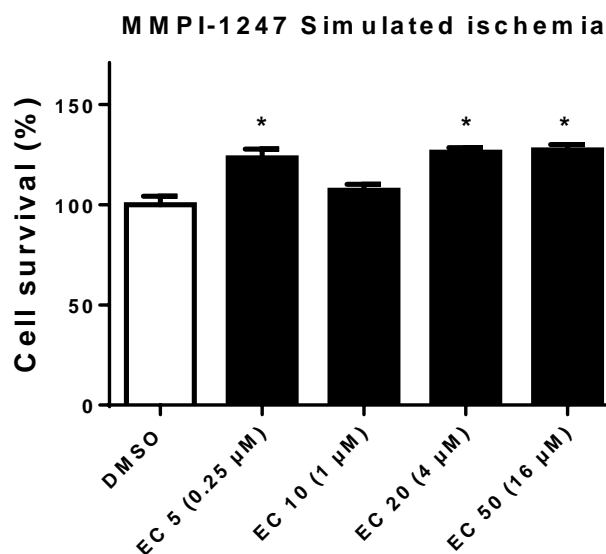

MMP inhibitor screen on neonatal rat cardiac myocytes.

Effect of each MMPIs (at EC 5, 10, 20, 50 concentration) on cardiac myocyte cell viability after 4 hours normoxia followed by 2 hours of simulated reperfusion (subpanels #1) and 4 hours simulated ischemia followed by 2 hours of simulated reperfusion (subpanels #2). Data are expressed in the ratio of vehicle (DMSO) control in percent. Positive data (more than 100%) shows higher viability compared to the control. Panel A: MMPI-1260; Panel B: MMPI-1157; Panel C: MMPI-1248; Panel D: MMPI-1253; Panel E: MMPI-1254; Panel F: MMPI-1154; Panel G: MMPI-1247. \* $p < 0.05$  vs. Vehicle (DMSO),  $n = 5-6$  (One-way ANOVA followed by Dunnett post hoc test).
