# Supplementary material for: Development of Matrix Metalloproteinase-2 Inhibitors for Cardioprotection
Source: PubMed Central journal article supplement (PMC5896266; doi:10.3389/fphar.2018.00296), 2018-04-05
Supplement: Image5.pdf [file Image5.pdf]

**Supplementary Figure 5:**

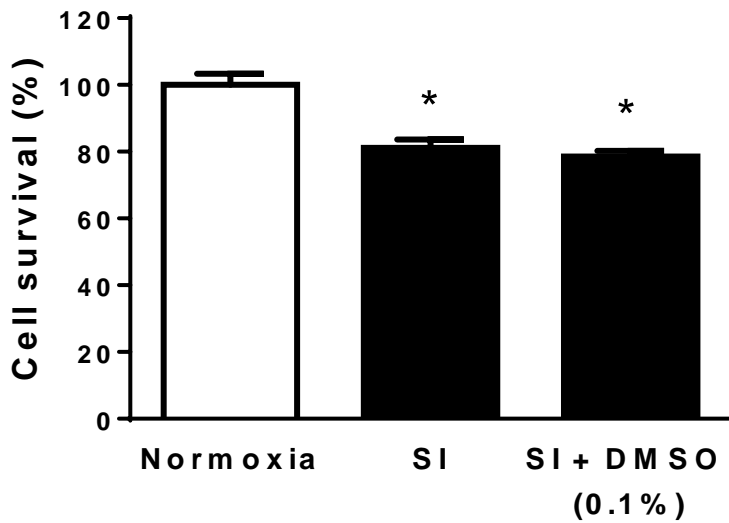

*Effect of simulated ischemia/reperfusion injury on cell survival and effect of vehicle*

Effect of 4 hours simulated ischemia followed by 2 hours of simulated reperfusion on cardiac myocyte cell viability in comparison to 4 hours normoxia followed by 2 hours of simulated reperfusion. Effect of 0,1% DMSO (vehicle) on cell viability. Data are expressed in the ratio of normoxic group in percent. \* $p < 0.05$ , (One-way ANOVA followed by Dunnett post hoc test).
