# Supplementary material for: Development of Matrix Metalloproteinase-2 Inhibitors for Cardioprotection
Source: PubMed Central journal article supplement (PMC5896266; doi:10.3389/fphar.2018.00296), 2018-04-05
Supplement: Image6.pdf [file Image6.pdf]

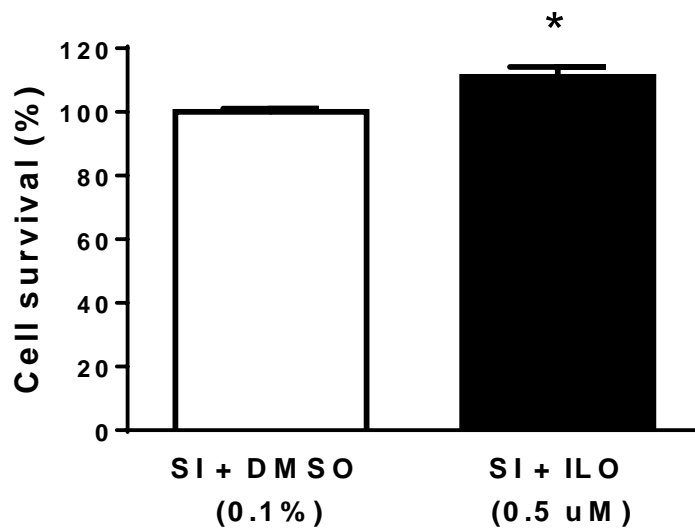

*Effect of positive control ilomastat on cell survival*

Effect of MMPis Ilomastate (at 0,5 uM concentration) on cardiac myocyte cell viability after 4 hours normoxia followed by 2 hours of simulated reperfusion. Data are expressed in the ratio of vehicle (DMSO) control in percent. \* $p < 0.05$  vs. Vehicle,  $n = 5-6$  (One-way ANOVA followed by Dunnett post hoc test).
